# Supplementary material
Source: MDPI journal article supplement (https://www.mdpi.com/2673-4834/3/1/24)
Supplement: s1 [file s1 › earth-1600324-supplementary.pdf]

## **Supplement of**

### **How Reliable Are Global Temperature Reconstructions of the Common Era?**

Sebastian Lüning <sup>1</sup>, Philipp Lengsfeld <sup>2</sup>

This Supplement contains additional comparison of the studied T2k series. Full, uniform display of all discussed reconstructions, except AR1-1990 (including simple descriptive statistical numbers from graphic program Origin). Modern instrumental data displayed in original manuscripts are not included, in order to not mix up different data types.

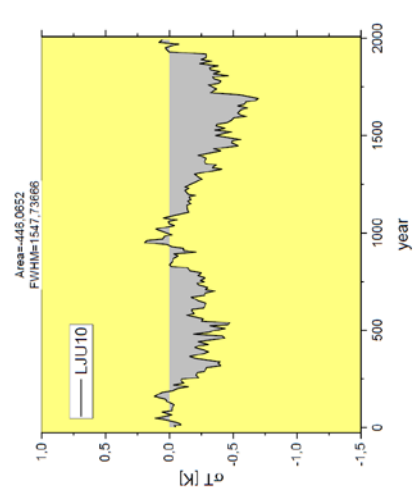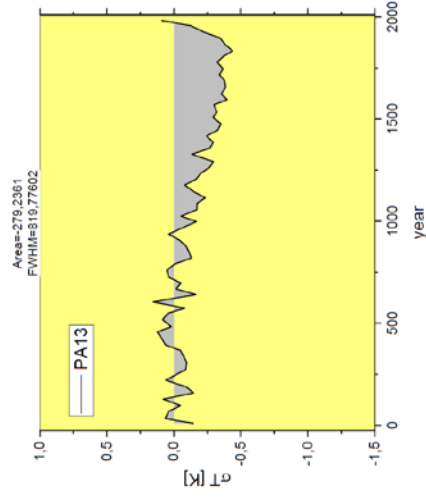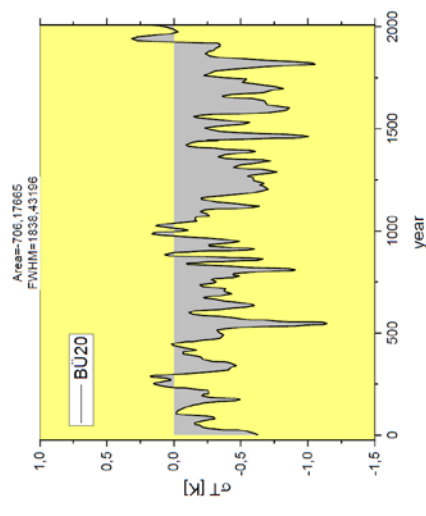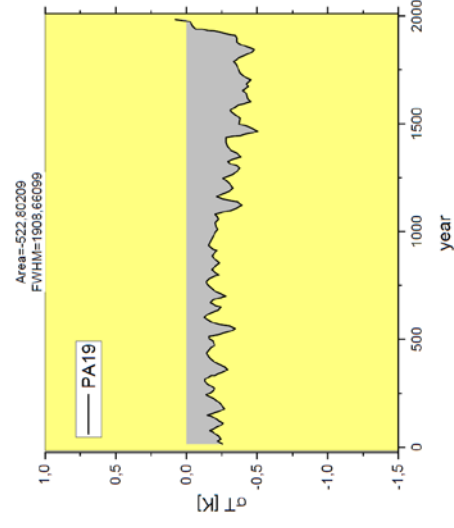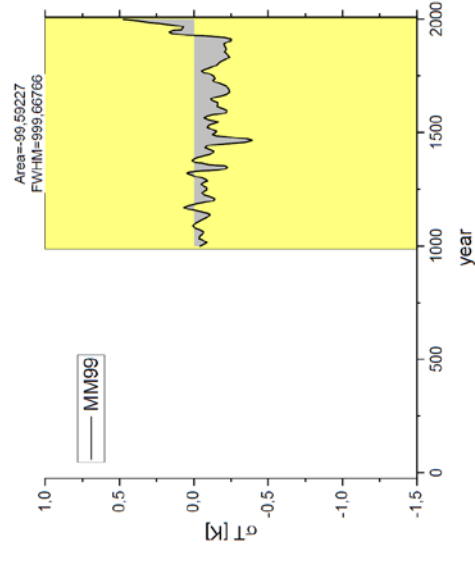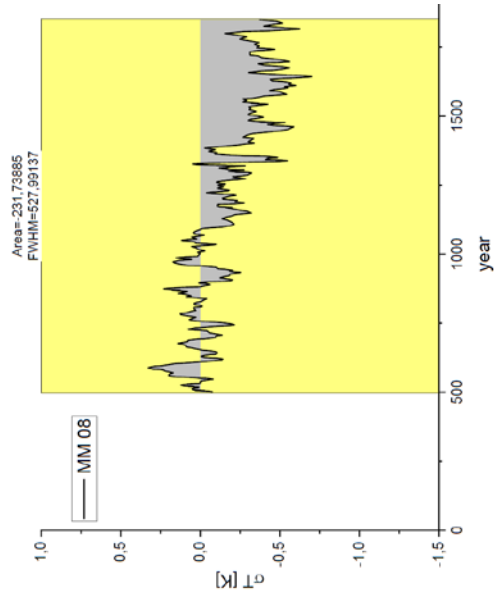

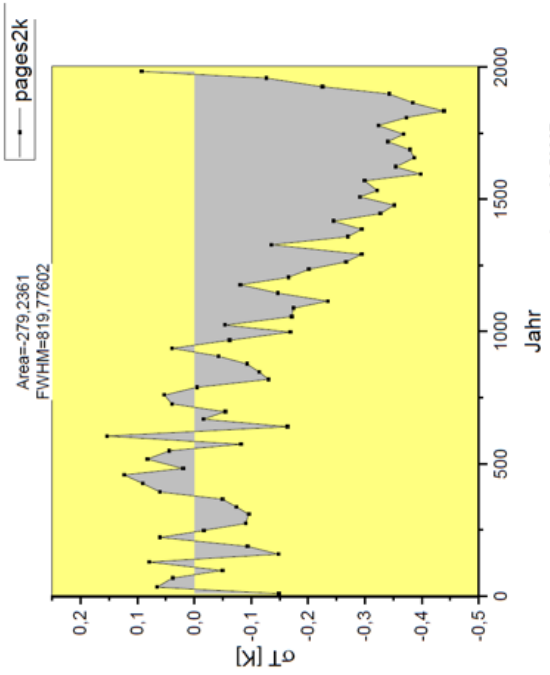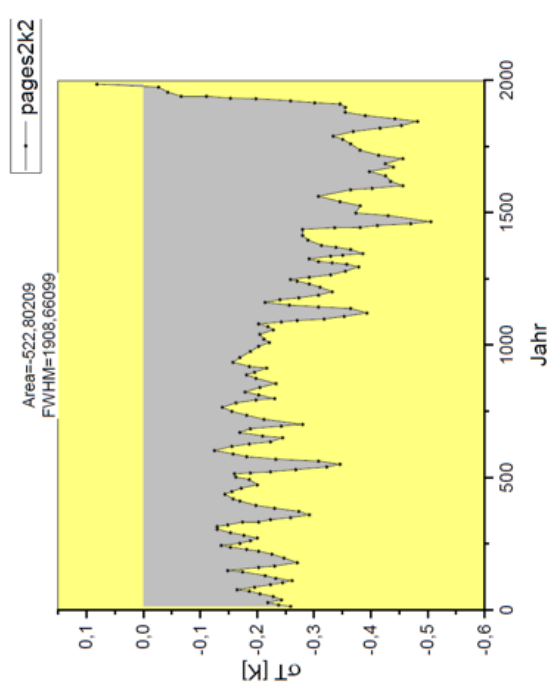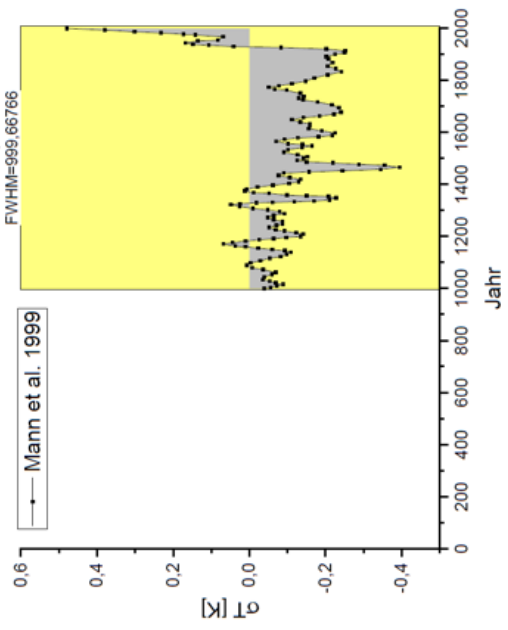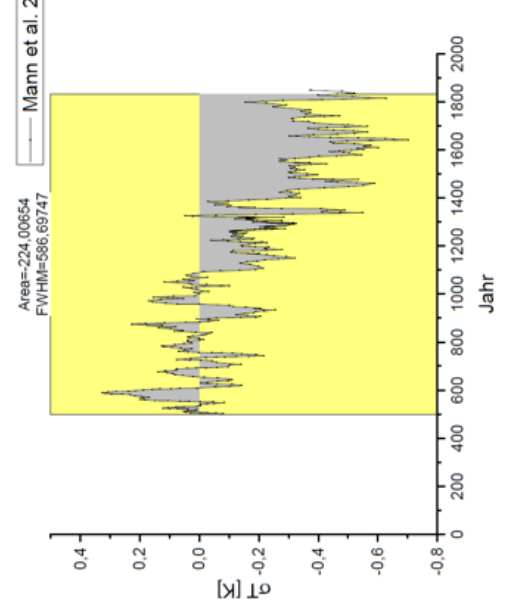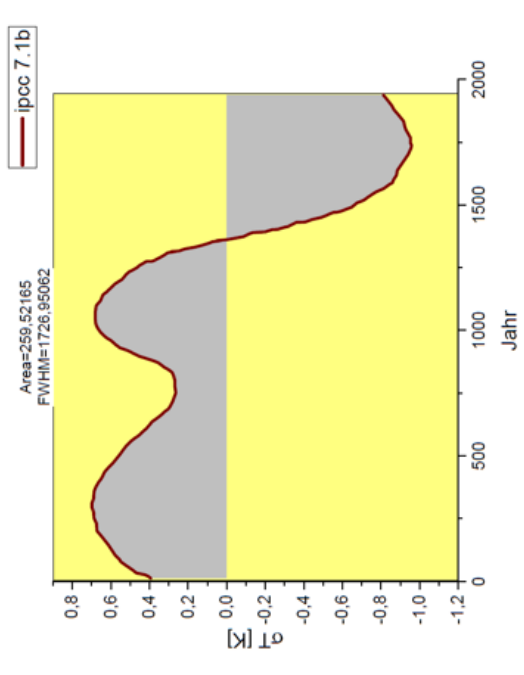

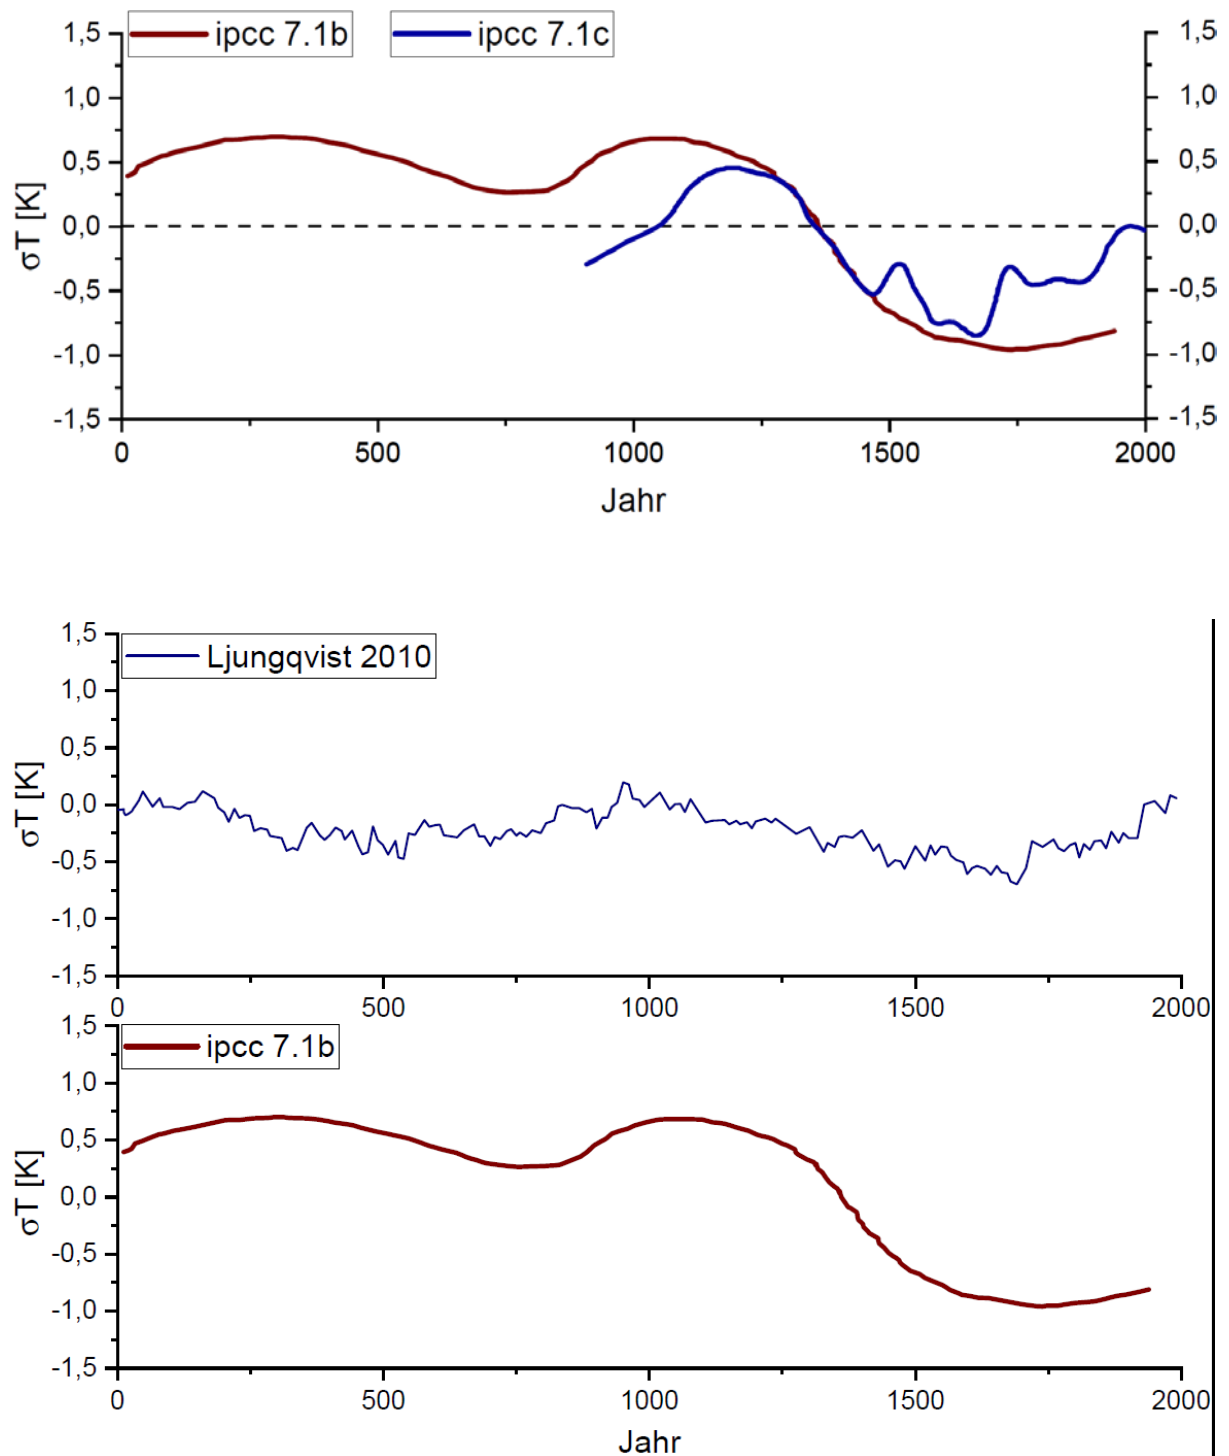

**Figure S1.** additional comparisons.
